# Supplementary material for: Polyphenols-Loaded Sericin Self-Assembling Nanoparticles: A Slow-Release for Regeneration by Tissue-Resident Mesenchymal Stem/Stromal Cells
Source: PubMed Central journal article supplement (PMC7238282; doi:10.3390/pharmaceutics12040381), 2020-04-21
Supplement: pharmaceutics-12-00381-s001.pdf [file pharmaceutics-12-00381-s001.pdf]

# Supplementary Materials: Polyphenols-Loaded Sericin Self-Assembling Nanoparticles: A Slow-Release for Regeneration by Tissue-Resident Mesenchymal Stem/Stromal Cells

Giulia Orlandi, Elia Bari, Laura Catenacci, Milena Sorrenti, Lorena Segale, Silvio Faragò, Marzio Sorlini, Carla Renata Arciola, Maria Luisa Torre and Sara Perteghella

## Isolation and Expansion of Human Adipose-Derived Mesenchymal Stromal Cells

Adipose tissues were obtained from three patients (mean age was  $47 \pm 4$ ) undergoing abdominoplasty surgery after informed consent (ASST Grande Ospedale Metropolitano Niguarda, Milan). Clinical sheets of donors (identity, gender, age, tissue processing, sampling site, the day of collection and anamnesis) were filed by the surgery-responsible structure. Donors with septicemia or extensive infections, syphilis, type B and C hepatitis, HIV, Creutzfeld-Jacobs disease, viral or unknown neurological diseases, human GH treatment, and malignant tumours were excluded from the trial. Tissue samples were repeatedly washed with Phosphate Buffer Saline (PBS, pH= 7.14) without  $\text{Ca}^{2+}$  and  $\text{Mg}^{2+}$  and mechanically minced by surgical scissors. Tissue digestion was performed with 0.075% (*w/v*) type II collagenase solubilized in PBS with  $\text{Ca}^{2+}$  and  $\text{Mg}^{2+}$  plus 1% penicillin/streptomycin and 1% (*w/v*) amphotericin B at 37 °C. After 1 hour, Dulbecco's modified Eagle's Medium (DMEM) and Ham's medium F12 (DMEM/F12, ratio 1:1) supplemented by 10% (*v/v*) fetal bovine serum (FBS) was added to cell suspension; the digested tissue was filtered on 70  $\mu\text{m}$  cell strainer (Greiner Bio-One, Milan, Italy) and centrifuged at 600 g for 5 minutes [1,2]. Recovered stromal vascular fraction was cultured in monolayer conditions (100,000 cells/ $\text{cm}^2$ ) in DMEM F12, 10% (*v/v*) FBS, 1% (*v/v*) penicillin/streptomycin and 1% (*v/v*) amphotericin B. Once MSCs reached sub-confluence, they were treated with 0.05% (*v/v*) trypsin-EDTA and seeded onto flasks (10,000 cells/ $\text{cm}^2$ ) at 37°C and 5%  $\text{CO}_2$  and cultured until P6 in DMEM F12, 10% (*v/v*) FBS, 1% (*v/v*) penicillin/streptomycin and 1% (*v/v*) amphotericin B. All MSCs were tested to assure all the requirements needed for clinical use in terms of identity (according to the International Society for Cellular Therapy), sterility (according to Eu. Ph. 9.0, 2.6.27), tumorigenesis and karyotype.

## Supplementary Figure

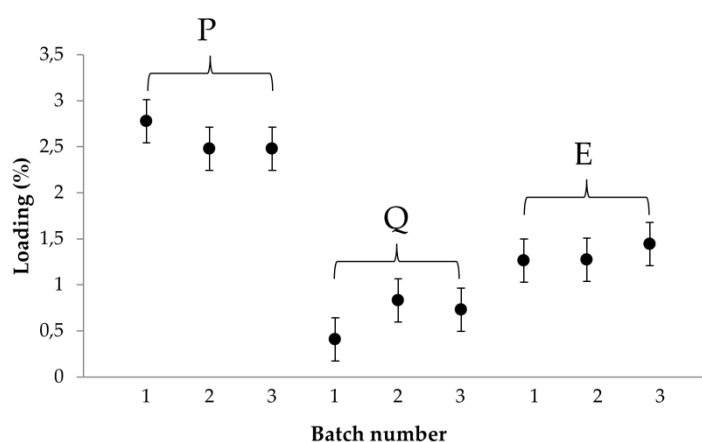

**Figure S1.** Drug loading (% *w/w*) of different batches (1, 2 and 3) for SNPs loaded with P, Q and E. Multifactor ANOVA, mean values  $\pm$  least significant difference (LSD),  $n = 3$ .

## Experiment to Confirm Drug Loading and Drug Release

An additional experiment was performed to confirm the drug loading and drug release data. Drug release experiments were repeated for each formulations in duplicate following the procedures reported in section 2.2.7. Briefly, for each batch 200 mg of SNPs were suspended in 5 mL of dissolution media and put into a dialysis membrane (3.5 kDa MWCO, Thermo Fisher Scientific, Milan, Italy). Each dialysis tube was incubated in 50 mL of dissolution media and maintained under mild magnetic stirring at 37 °C. After 80 h, the amount of released drug was determined by a spectrophotometric method (UV/VIS Spectrometer Lambda20, PerkinElmer, Wellesley, MA, USA) analyzing the release media at 279, 275 and 373 nm for P, E and Q, respectively. The drug concentration was extrapolated from a calibration curve previously prepared (P 5–80 µg/mL,  $R^2 = 0.99$ ; Q 0.5–15 µg/mL,  $R^2 = 0.99$ ; E 5–30 µg/mL,  $R^2 = 0.98$ ). The cumulative amount of released drug was calculated in percentage using the following equation:

$$\text{Cumulative amount of drug released (\%)} = C_i/C_0 \times 100 \quad (S1)$$

where  $C_i$  was the amount of the drug released at 80 hours and  $C_0$  was the loaded drug amount.

Then, SNPs inside the dialysis bag were recovered and bring to a final volume of 50 mL by using the dissolving media reported in the section 2.2.3. In detail, SNP-P and SNP-E were dissolved in deionized water plus HCl (0.1%, *v/v*), while SNP-Q were dissolved in ethanol 96% (*v/v*) maintaining mild magnetic stirring in the dark. The dialysis membranes were repeatedly washed with the abovementioned dissolution media to recover all SNPs. The drug content was measured from standard calibration curves obtained analyzing a concentration range of 10–80 µg/mL,  $R^2 = 0.99$  for P; 0.5–20 µg/mL for Q,  $R^2 = 0.98$ ; 5–50 µg/mL for E,  $R^2 = 0.99$ . Data are reported as mean value  $\pm$  standard deviation ( $n = 2$ ).

In vitro drug release data confirmed what reported in the text of the manuscript. In EtOH, the percentage of drug released was  $21.34 \pm 5.639$  for SNP-P,  $50.69 \pm 12.387$  for SNP-Q and  $63.35 \pm 6.581$  for SNP-E. In PBS, SNP-P and SNP-E released the  $44.72 \pm 8.593$  and  $48.27 \pm 7.542$  percentage of the whole drug, respectively, while SNP-Q released the  $18.47 \pm 6.522$ . After EtOH release, the amount of drug recovered after dissolution of SNPs was  $73.22 \pm 2.68$  for SNP-P,  $44.85 \pm 5.986$  for SNP-Q and  $33.23 \pm 4.896$  for SNP-E. After PBS release, the amount of drug recovered after dissolving SNPs was  $48.87 \pm 2.569$  for SNP-P,  $75.58 \pm 9.635$  for SNP-Q and  $47.58 \pm 5.841$  for SNP-E. Overall, the results confirmed that the drug not released was retained into SNPs.

## References

1. Gaetani, P.; Torre, M.L.; Klinger, M.; Faustini, M.; Crovato, F.; Bucco, M.; Marazzi, M.; Chlapanidas, T.; Levi, D.; Tancioni, F., et al. Adipose-derived stem cell therapy for intervertebral disc regeneration: An in vitro reconstructed tissue in alginate capsules. *Tissue Engineering Part A* **2008**, *14*, 1415–1423, doi:10.1089/ten.tea.2007.0330.
2. Faustini, M.; Bucco, M.; Chlapanidas, T.; Lucconi, G.; Marazzi, M.; Tosca, M.C.; Gaetani, P.; Klinger, M.; Villani, S.; Ferretti, V.V., et al. Nonexpanded Mesenchymal Stem Cells for Regenerative Medicine: Yield in Stromal Vascular Fraction from Adipose Tissues. *Tissue Engineering Part C-Methods* **2010**, *16*, 1515–1521, doi:10.1089/ten.tec.2010.0214.
